# Supplementary material
Source: Springer Nature journal article supplement (https://www.springermedizin.de/resource/supplementary/13058_2010_2596_MOESM9_ESM.pdf/9701780)

**A**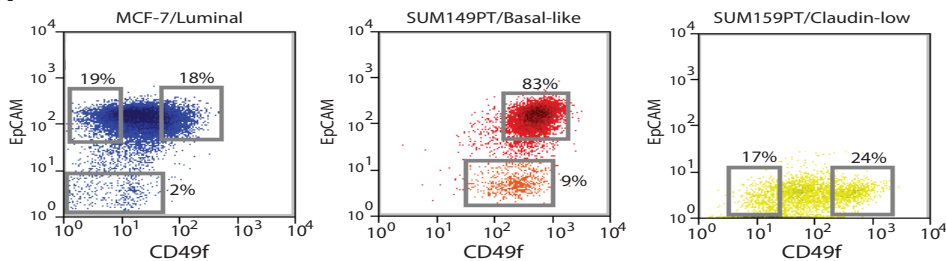**B**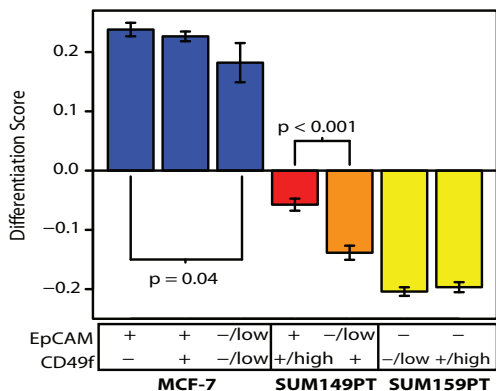**C**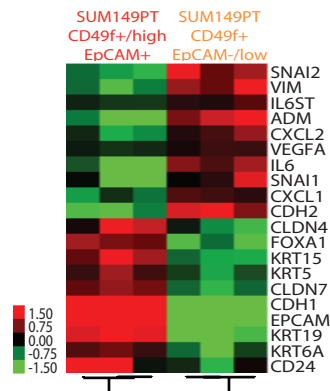**D**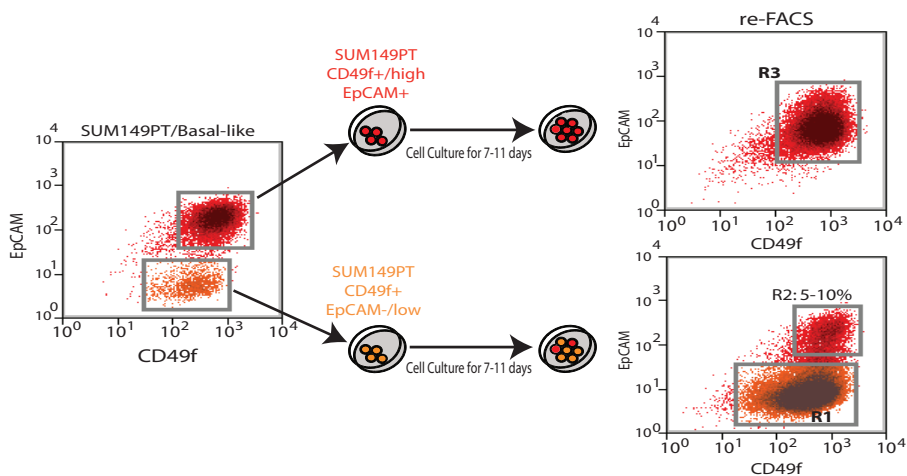

Supplement: MOESM9 [file 9701780]
